# Supplementary material
Source: Springer Nature journal article supplement (https://www.springermedizin.de/resource/supplementary/12879_2008_787_MOESM6_ESM.pdf/9449782)

Hospitalisations/100,000 inhabitants

2002 2003 2004 2005 2006 2007

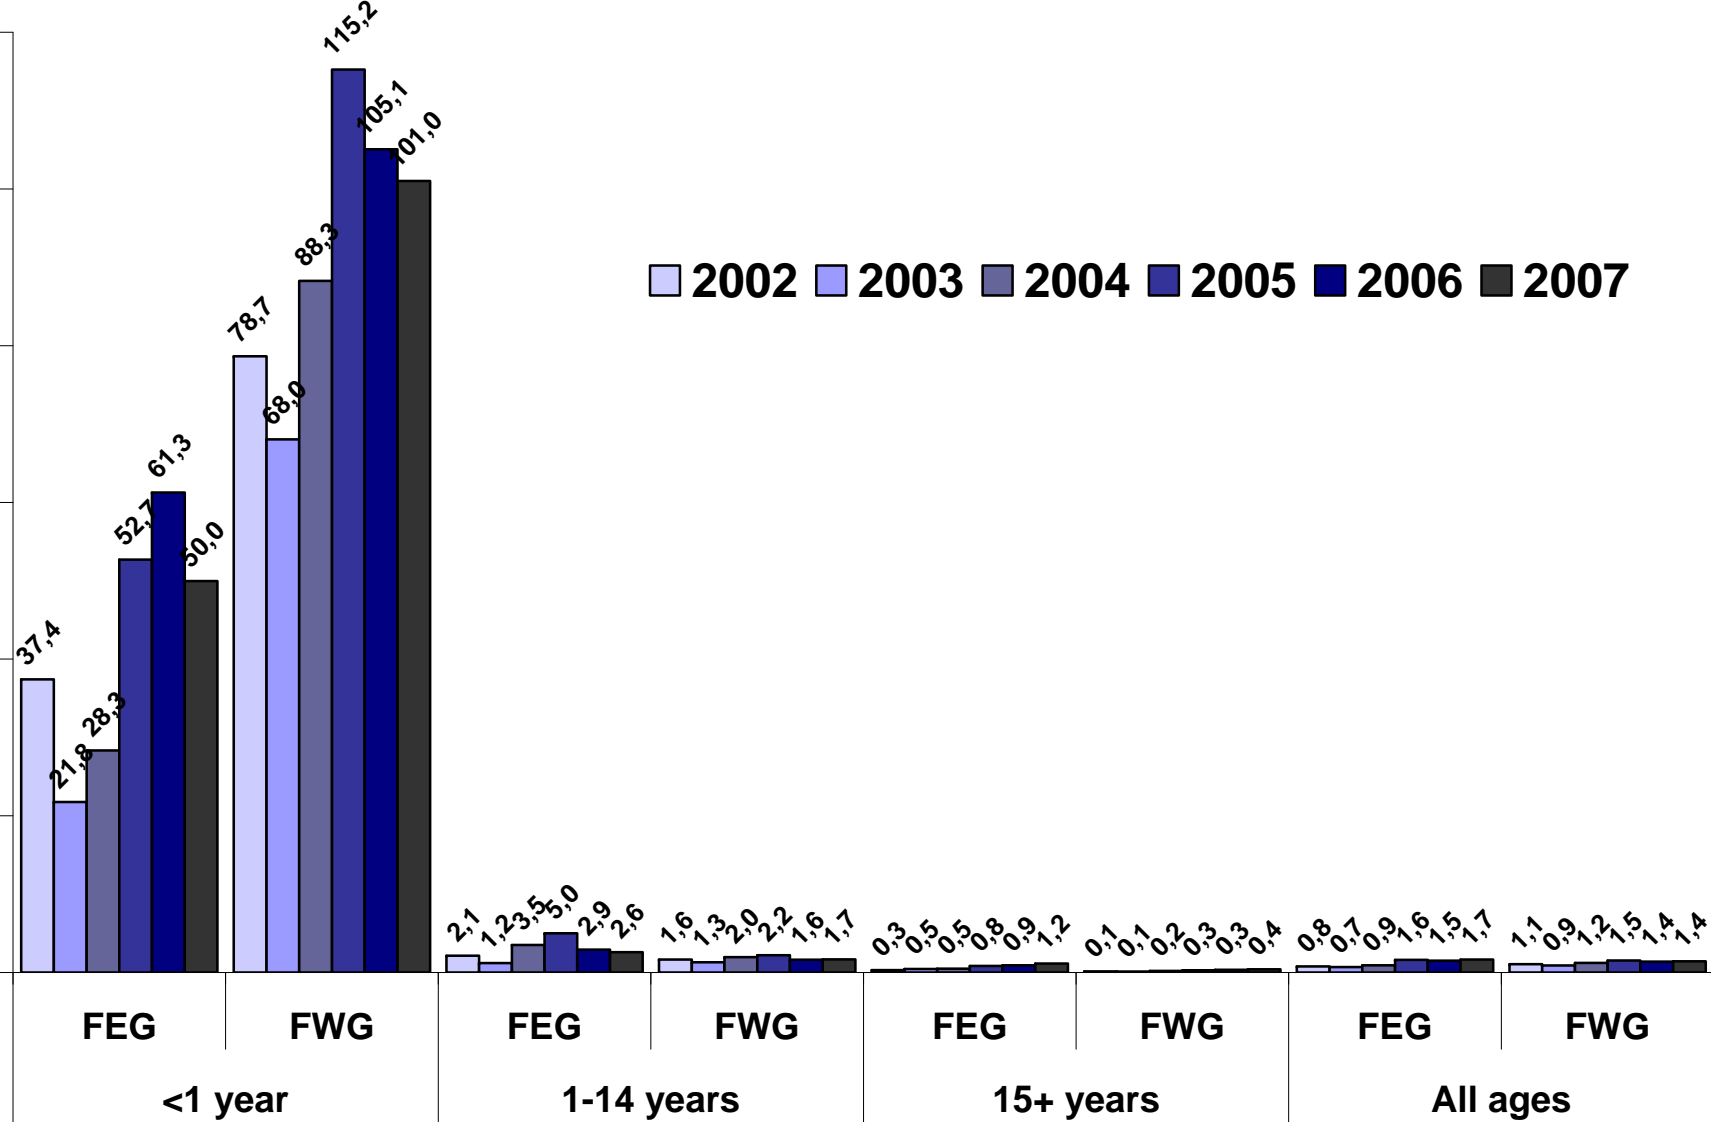

Supplement: MOESM6 [file 9449782]
